# Supplementary material for: New Insight into the Prevalence and Risk Factors for Three Distinct Hoof Conformation Traits in UK Commercial Sheep Flocks
Source: MDPI journal article supplement (doi:10.3390/vetsci8090176), 2021-08-30
Supplement: s1 [file s1]

## Supplementary Materials

**Table S1.** Univariable analyses of the associations with sole and heel conformation score for 5672 foot-level observations of 400 ewes.

| Variable                                                                      | <i>n</i> | %    | $\beta$     | Lower<br>95% CI | Upper<br>95% CI |
|-------------------------------------------------------------------------------|----------|------|-------------|-----------------|-----------------|
| <i>Sheep-level variables</i>                                                  |          |      |             |                 |                 |
| <b>Age</b>                                                                    |          |      |             |                 |                 |
| < 4 years                                                                     | 3528     | 62.2 | ref         |                 |                 |
| ≥ 4 years                                                                     | 2144     | 37.8 | <b>0.08</b> | 0.01            | 0.14            |
| <b>BCS</b>                                                                    |          |      |             |                 |                 |
| 3.0                                                                           | 2816     | 49.6 | ref         |                 |                 |
| < 3.0                                                                         | 828      | 14.6 | 0.00        | -0.06           | 0.07            |
| > 3.0                                                                         | 2028     | 35.8 | <b>0.10</b> | 0.04            | 0.15            |
| <i>Foot-level variables</i>                                                   |          |      |             |                 |                 |
| <b>Foot position</b>                                                          |          |      |             |                 |                 |
| Front                                                                         | 2836     | 50.0 | ref         |                 |                 |
| Back                                                                          | 2836     | 50.0 | <b>0.06</b> | 0.02            | 0.10            |
| <b>Number of other feet with poor sole and heel conformation (scores ≥ 1)</b> |          |      |             |                 |                 |
| No other feet affected                                                        | 3306     | 58.3 | ref         |                 |                 |
| One other foot affected                                                       | 1418     | 25.0 | <b>0.29</b> | 0.24            | 0.33            |
| Two other feet affected                                                       | 716      | 12.6 | <b>0.56</b> | 0.50            | 0.62            |
| Three other feet affected                                                     | 232      | 4.1  | <b>0.91</b> | 0.81            | 1.00            |
| <b>Clinical disease</b>                                                       |          |      |             |                 |                 |
| No FR disease present                                                         | 5204     | 91.7 | ref         |                 |                 |
| ID and/or SFR present                                                         | 468      | 8.3  | <b>0.28</b> | 0.20            | 0.35            |
| <i>Farm-level variables</i>                                                   |          |      |             |                 |                 |
| <b>Vaccination status</b>                                                     |          |      |             |                 |                 |
| Flock not vaccinated against footrot (Footvax®)                               | 2816     | 49.6 | ref         |                 |                 |
| Flock vaccinated against footrot (Footvax®)                                   | 2856     | 50.4 | 0.14        | -0.21           | 0.48            |
| <b>Soil type</b>                                                              |          |      |             |                 |                 |
| Loamy                                                                         | 1364     | 24.0 | ref         |                 |                 |
| Clay                                                                          | 2856     | 50.4 | 0.14        | -0.04           | 0.33            |
| Loamy/clay mix                                                                | 1452     | 25.6 | <b>0.38</b> | 0.17            | 0.60            |
| <b>Pasture moisture (calendar month of visit) (<i>n</i> = 4512)</b>           |          |      |             |                 |                 |
| Dry (“hard”)                                                                  | 996      | 22.1 | ref         |                 |                 |
| Damp (“firm”)                                                                 | 2064     | 45.7 | <b>0.07</b> | 0.02            | 0.12            |
| Wet (“squelchy”)                                                              | 1452     | 32.2 | <b>0.10</b> | 0.04            | 0.16            |
| Saturated (“boggy”)                                                           | 0        | 0.0  | -           | -               | -               |
| <b>Pasture moisture (lagged to previous calendar month)</b>                   |          |      |             |                 |                 |
| Dry (“hard”)                                                                  | 1604     | 28.3 | ref         |                 |                 |
| Damp (“firm”)                                                                 | 2140     | 37.7 | <b>0.11</b> | 0.06            | 0.16            |

|                                             |      |       |              |       |       |
|---------------------------------------------|------|-------|--------------|-------|-------|
| Wet (“squelchy”)                            | 768  | 13.5  | <b>0.20</b>  | 0.13  | 0.27  |
| Saturated (“boggy”)                         | 1160 | 20.5  | <b>0.45</b>  | 0.40  | 0.51  |
| <b>Pasture quality</b>                      |      |       |              |       |       |
| <b>(calendar month of visit) (n = 4512)</b> |      |       |              |       |       |
| Lush (~ 90% leafy rye grasses)              | 2812 | 62.3  | ref          |       |       |
| Average (~ 50% rye grasses)                 | 1700 | 37.7  | <b>0.15</b>  | 0.09  | 0.21  |
| Poor (mostly stalk and weeds)               | 0    | 0.0   | -            | -     | -     |
| <b>Pasture quality</b>                      |      |       |              |       |       |
| <b>(lagged to previous calendar month)</b>  |      |       |              |       |       |
| Lush (~ 90% leafy rye grasses)              | 2516 | 44.4  | ref          |       |       |
| Average (~ 50% rye grasses)                 | 2760 | 48.7  | <b>0.43</b>  | 0.34  | 0.51  |
| Poor (mostly stalk and weeds)               | 396  | 7.0   | <b>0.68</b>  | 0.56  | 0.80  |
| <b>Pasture type</b>                         |      |       |              |       |       |
| <b>(calendar month of visit) (n = 4512)</b> |      |       |              |       |       |
| Permanent grassland                         | 1008 | 22.3  | ref          |       |       |
| New grass ley                               | 752  | 16.7  | 0.13         | -0.20 | 0.47  |
| Mix permanent and new ley                   | 2752 | 61.0  | 0.09         | -0.24 | 0.42  |
| <b>Pasture type</b>                         |      |       |              |       |       |
| <b>(lagged to previous calendar month)</b>  |      |       |              |       |       |
| Permanent grassland                         | 1768 | 31.2  | ref          |       |       |
| New grass ley                               | 3584 | 63.2  | <b>-0.10</b> | -0.17 | -0.02 |
| Mix permanent and new ley                   | 320  | 5.6   | <b>-0.25</b> | -0.34 | -0.16 |
| <b>Sward height</b>                         |      |       |              |       |       |
| <b>(calendar month of visit) (n = 4512)</b> |      |       |              |       |       |
| Approx. 3 cm                                | 1876 | 41.6  | ref          |       |       |
| Approx. 8 cm                                | 2324 | 51.5  | -0.03        | -0.07 | 0.02  |
| Approx. > 8 cm                              | 312  | 6.9   | <b>-0.21</b> | -0.29 | -0.12 |
| <b>Sward height</b>                         |      |       |              |       |       |
| <b>(lagged to previous calendar month)</b>  |      |       |              |       |       |
| Approx. 3 cm                                | 2068 | 36.5  | ref          |       |       |
| Approx. 8 cm                                | 3208 | 56.6  | <b>-0.12</b> | -0.17 | -0.06 |
| Approx. > 8 cm                              | 396  | 7.0   | <b>0.18</b>  | 0.09  | 0.27  |
| <b>Rainfall</b>                             |      |       |              |       |       |
| <b>(calendar month of visit)</b>            |      |       |              |       |       |
| Rainfall                                    | 5672 | 100.0 | 0.00         | 0.00  | 0.00  |
| <b>Rainfall</b>                             |      |       |              |       |       |
| <b>(lagged to previous calendar month)</b>  |      |       |              |       |       |
| Temperature                                 | 5672 | 100.0 | <b>-0.03</b> | -0.03 | -0.02 |
| <b>Temperature</b>                          |      |       |              |       |       |
| <b>(lagged to previous calendar month)</b>  |      |       |              |       |       |
| Temperature                                 | 5672 | 100.0 | <b>-0.03</b> | -0.03 | -0.02 |
| <b>Time variable</b>                        |      |       |              |       |       |
| <b>Visit</b>                                |      |       |              |       |       |
| 1 (Sep 2019)                                | 1556 | 27.4  | ref          |       |       |
| 2 (Jan 2020)                                | 1536 | 27.1  | <b>0.30</b>  | 0.25  | 0.35  |
| 3 (Jul 2020)                                | 1356 | 23.9  | <b>-0.09</b> | -0.14 | -0.03 |
| 4 (Sep 2020)                                | 1224 | 21.6  | <b>-0.08</b> | -0.13 | -0.02 |

β: estimate; CI: confidence interval for estimate; bold estimates are statistically significant at 0.05 as their CIs do not include 0; ref: baseline category for comparison.

**Table S2.** Univariable analyses of the associations with hoof wall conformation score for 5672 foot-level observations of 400 ewes.

| Variable                                                                                  | <i>n</i> | %    | $\beta$      | Lower<br>95% CI | Upper<br>95% CI |
|-------------------------------------------------------------------------------------------|----------|------|--------------|-----------------|-----------------|
| <i>Sheep-level variables</i>                                                              |          |      |              |                 |                 |
| <b>Age</b>                                                                                |          |      |              |                 |                 |
| < 4 years                                                                                 | 3528     | 62.2 | ref          |                 |                 |
| $\geq 4$ years                                                                            | 2144     | 37.8 | <b>0.13</b>  | 0.02            | 0.24            |
| <b>BCS</b>                                                                                |          |      |              |                 |                 |
| 3.0                                                                                       | 2816     | 49.6 | ref          |                 |                 |
| < 3.0                                                                                     | 828      | 14.6 | <b>0.15</b>  | 0.05            | 0.25            |
| > 3.0                                                                                     | 2028     | 35.8 | 0.03         | -0.05           | 0.11            |
| <i>Foot-level variables</i>                                                               |          |      |              |                 |                 |
| <b>Foot position</b>                                                                      |          |      |              |                 |                 |
| Front                                                                                     | 2836     | 50.0 | ref          |                 |                 |
| Back                                                                                      | 2836     | 50.0 | <b>0.20</b>  | 0.15            | 0.26            |
| <b>Number of other feet with poor hoof wall conformation (scores <math>\geq 1</math>)</b> |          |      |              |                 |                 |
| No other feet affected                                                                    | 381      | 6.7  | ref          |                 |                 |
| One other foot affected                                                                   | 903      | 15.9 | <b>0.28</b>  | 0.15            | 0.41            |
| Two other feet affected                                                                   | 1551     | 27.3 | <b>0.63</b>  | 0.50            | 0.75            |
| Three other feet affected                                                                 | 2837     | 50.0 | <b>1.11</b>  | 0.99            | 1.22            |
| <b>Clinical disease</b>                                                                   |          |      |              |                 |                 |
| No FR disease present                                                                     | 5204     | 91.7 | ref          |                 |                 |
| ID and/or SFR present                                                                     | 468      | 8.3  | <b>0.28</b>  | 0.17            | 0.39            |
| <i>Farm-level variables</i>                                                               |          |      |              |                 |                 |
| <b>Vaccination status</b>                                                                 |          |      |              |                 |                 |
| Flock not vaccinated against footrot (Footvax®)                                           | 2816     | 49.6 | ref          |                 |                 |
| Flock vaccinated against footrot (Footvax®)                                               | 2856     | 50.4 | -0.12        | -0.55           | 0.32            |
| <b>Soil type</b>                                                                          |          |      |              |                 |                 |
| Loamy                                                                                     | 1364     | 24.0 | ref          |                 |                 |
| Clay                                                                                      | 2856     | 50.4 | -0.07        | -0.35           | 0.22            |
| Loamy/clay mix                                                                            | 1452     | 25.6 | <b>-0.40</b> | -0.73           | -0.07           |
| <b>Pasture moisture (calendar month of visit) (<i>n</i> = 4512)</b>                       |          |      |              |                 |                 |
| Dry ("hard")                                                                              | 996      | 22.1 | ref          |                 |                 |
| Damp ("firm")                                                                             | 2064     | 45.7 | <b>0.09</b>  | 0.01            | 0.17            |
| Wet ("squelchy")                                                                          | 1452     | 32.2 | <b>-0.31</b> | -0.41           | -0.21           |
| Saturated ("boggy")                                                                       | 0        | 0.0  | -            | -               | -               |
| <b>Pasture moisture (lagged to previous calendar month)</b>                               |          |      |              |                 |                 |
| Dry ("hard")                                                                              | 1604     | 28.3 | ref          |                 |                 |
| Damp ("firm")                                                                             | 2140     | 37.7 | <b>-0.13</b> | -0.21           | -0.05           |
| Wet ("squelchy")                                                                          | 768      | 13.5 | <b>-0.17</b> | -0.28           | -0.07           |
| Saturated ("boggy")                                                                       | 1160     | 20.5 | <b>-0.13</b> | -0.21           | -0.04           |
| <b>Pasture quality</b>                                                                    |          |      |              |                 |                 |

|                                             |      |       |              |       |       |
|---------------------------------------------|------|-------|--------------|-------|-------|
| <b>(calendar month of visit) (n = 4512)</b> |      |       |              |       |       |
| Lush (~ 90% leafy rye grasses)              | 2812 | 62.3  | ref          |       |       |
| Average (~ 50% rye grasses)                 | 1700 | 37.7  | <b>0.44</b>  | 0.36  | 0.53  |
| Poor (mostly stalk and weeds)               | 0    | 0.0   | -            | -     | -     |
| <b>Pasture quality</b>                      |      |       |              |       |       |
| <b>(lagged to previous calendar month)</b>  |      |       |              |       |       |
| Lush (~ 90% leafy rye grasses)              | 2516 | 44.4  | ref          |       |       |
| Average (~ 50% rye grasses)                 | 2760 | 48.7  | <b>-0.17</b> | -0.29 | -0.05 |
| Poor (mostly stalk and weeds)               | 396  | 7.0   | <b>-0.19</b> | -0.36 | -0.01 |
| <b>Pasture type</b>                         |      |       |              |       |       |
| <b>(calendar month of visit) (n = 4512)</b> |      |       |              |       |       |
| Permanent grassland                         | 1008 | 22.3  | ref          |       |       |
| New grass ley                               | 752  | 16.7  | <b>-0.74</b> | -0.83 | -0.66 |
| Mix permanent and new ley                   | 2752 | 61.0  | <b>-0.08</b> | -0.15 | -0.02 |
| <b>Pasture type</b>                         |      |       |              |       |       |
| <b>(lagged to previous calendar month)</b>  |      |       |              |       |       |
| Permanent grassland                         | 1768 | 31.2  | ref          |       |       |
| New grass ley                               | 3584 | 63.2  | <b>-0.50</b> | -0.60 | -0.39 |
| Mix permanent and new ley                   | 320  | 5.6   | <b>-0.62</b> | -0.75 | -0.49 |
| <b>Sward height</b>                         |      |       |              |       |       |
| <b>(calendar month of visit) (n = 4512)</b> |      |       |              |       |       |
| Approx. 3 cm                                | 1876 | 41.6  | ref          |       |       |
| Approx. 8 cm                                | 2324 | 51.5  | <b>0.61</b>  | 0.54  | 0.67  |
| Approx. > 8 cm                              | 312  | 6.9   | <b>0.53</b>  | 0.39  | 0.67  |
| <b>Sward height</b>                         |      |       |              |       |       |
| <b>(lagged to previous calendar month)</b>  |      |       |              |       |       |
| Approx. 3 cm                                | 2068 | 36.5  | ref          |       |       |
| Approx. 8 cm                                | 3208 | 56.6  | -0.08        | -0.16 | 0.00  |
| Approx. > 8 cm                              | 396  | 7.0   | <b>-0.20</b> | -0.32 | -0.07 |
| <b>Rainfall</b>                             |      |       |              |       |       |
| <b>(calendar month of visit)</b>            |      |       |              |       |       |
| Rainfall                                    | 5672 | 100.0 | <b>-0.01</b> | -0.01 | -0.01 |
| <b>Rainfall</b>                             |      |       |              |       |       |
| <b>(lagged to previous calendar month)</b>  |      |       |              |       |       |
| Temperature                                 | 5672 | 100.0 | <b>-0.03</b> | -0.04 | -0.02 |
| <b>Temperature</b>                          |      |       |              |       |       |
| <b>(lagged to previous calendar month)</b>  |      |       |              |       |       |
| <b>Time variable</b>                        |      |       |              |       |       |
| <b>Visit</b>                                |      |       |              |       |       |
| 1 (Sep 2019)                                | 1556 | 27.4  | ref          |       |       |
| 2 (Jan 2020)                                | 1536 | 27.1  | <b>0.32</b>  | 0.25  | 0.40  |
| 3 (Jul 2020)                                | 1356 | 23.9  | <b>0.30</b>  | 0.22  | 0.37  |
| 4 (Sep 2020)                                | 1224 | 21.6  | <b>0.61</b>  | 0.53  | 0.69  |

β: estimate; CI: confidence interval for estimate; bold estimates are statistically significant at 0.05 as their CIs do not include 0; ref: baseline category for comparison.

**Table S3.** Univariable analyses of the associations with hoof wall overgrowth score for 5672 foot-level observations of 400 ewes.

| Variable                                                                                   | <i>n</i> | %    | $\beta$      | Lower<br>95% CI | Upper<br>95% CI |
|--------------------------------------------------------------------------------------------|----------|------|--------------|-----------------|-----------------|
| <b><i>Sheep-level variables</i></b>                                                        |          |      |              |                 |                 |
| <b>Age</b>                                                                                 |          |      |              |                 |                 |
| < 4 years                                                                                  | 3528     | 62.2 | ref          |                 |                 |
| $\geq 4$ years                                                                             | 2144     | 37.8 | <b>0.17</b>  | 0.05            | 0.28            |
| <b>BCS</b>                                                                                 |          |      |              |                 |                 |
| 3.0                                                                                        | 2816     | 49.6 | ref          |                 |                 |
| < 3.0                                                                                      | 828      | 14.6 | <b>0.51</b>  | 0.41            | 0.62            |
| > 3.0                                                                                      | 2028     | 35.8 | <b>-0.46</b> | -0.54           | -0.37           |
| <b><i>Foot-level variables</i></b>                                                         |          |      |              |                 |                 |
| <b>Foot position</b>                                                                       |          |      |              |                 |                 |
| Front                                                                                      | 2836     | 50.0 | ref          |                 |                 |
| Back                                                                                       | 2836     | 50.0 | <b>-0.54</b> | -0.60           | -0.49           |
| <b>Number of other feet with hoof wall overgrowth present (scores <math>\geq 1</math>)</b> |          |      |              |                 |                 |
| No other feet affected                                                                     | 728      | 12.8 | ref          |                 |                 |
| One other foot affected                                                                    | 672      | 11.8 | <b>0.57</b>  | 0.45            | 0.68            |
| Two other feet affected                                                                    | 900      | 15.9 | <b>0.73</b>  | 0.62            | 0.85            |
| Three other feet affected                                                                  | 3372     | 59.4 | <b>1.72</b>  | 1.63            | 1.82            |
| <b>Clinical disease</b>                                                                    |          |      |              |                 |                 |
| No FR disease present                                                                      | 5204     | 91.7 | ref          |                 |                 |
| ID and/or SFR present                                                                      | 468      | 8.3  | <b>-0.38</b> | -0.50           | -0.26           |
| <b><i>Farm-level variables</i></b>                                                         |          |      |              |                 |                 |
| <b>Vaccination status</b>                                                                  |          |      |              |                 |                 |
| Flock not vaccinated against footrot (Footvax®)                                            | 2816     | 49.6 | ref          |                 |                 |
| Flock vaccinated against footrot (Footvax®)                                                | 2856     | 50.4 | -0.68        | -1.95           | 0.60            |
| <b>Soil type</b>                                                                           |          |      |              |                 |                 |
| Loamy                                                                                      | 1364     | 24.0 | ref          |                 |                 |
| Clay                                                                                       | 2856     | 50.4 | <b>-0.82</b> | -1.23           | -0.41           |
| Loamy/clay mix                                                                             | 1452     | 25.6 | <b>-1.59</b> | -2.07           | -1.12           |
| <b>Pasture moisture (calendar month of visit) (<i>n</i> = 4512)</b>                        |          |      |              |                 |                 |
| Dry ("hard")                                                                               | 996      | 22.1 | ref          |                 |                 |
| Damp ("firm")                                                                              | 2064     | 45.7 | <b>-0.62</b> | -0.69           | -0.54           |
| Wet ("squelchy")                                                                           | 1452     | 32.2 | <b>-1.08</b> | -1.18           | -0.98           |
| Saturated ("boggy")                                                                        | 0        | 0.0  | -            | -               | -               |
| <b>Pasture moisture (lagged to previous calendar month)</b>                                |          |      |              |                 |                 |
| Dry ("hard")                                                                               | 1604     | 28.3 | ref          |                 |                 |
| Damp ("firm")                                                                              | 2140     | 37.7 | <b>-0.57</b> | -0.65           | -0.50           |
| Wet ("squelchy")                                                                           | 768      | 13.5 | <b>-1.50</b> | -1.60           | -1.40           |
| Saturated ("boggy")                                                                        | 1160     | 20.5 | <b>0.24</b>  | 0.15            | 0.32            |
| <b>Pasture quality</b>                                                                     |          |      |              |                 |                 |

|                                             |      |       |              |       |       |
|---------------------------------------------|------|-------|--------------|-------|-------|
| <b>(calendar month of visit) (n = 4512)</b> |      |       |              |       |       |
| Lush (~ 90% leafy rye grasses)              | 2812 | 62.3  | ref          |       |       |
| Average (~ 50% rye grasses)                 | 1700 | 37.7  | <b>-0.13</b> | -0.22 | -0.04 |
| Poor (mostly stalk and weeds)               | 0    | 0.0   | -            | -     | -     |
| <b>Pasture quality</b>                      |      |       |              |       |       |
| <b>(lagged to previous calendar month)</b>  |      |       |              |       |       |
| Lush (~ 90% leafy rye grasses)              | 2516 | 44.4  | ref          |       |       |
| Average (~ 50% rye grasses)                 | 2760 | 48.7  | <b>1.93</b>  | 1.81  | 2.05  |
| Poor (mostly stalk and weeds)               | 396  | 7.0   | <b>1.13</b>  | 0.96  | 1.30  |
| <b>Pasture type</b>                         |      |       |              |       |       |
| <b>(calendar month of visit) (n = 4512)</b> |      |       |              |       |       |
| Permanent grassland                         | 1008 | 22.3  | ref          |       |       |
| New grass ley                               | 752  | 16.7  | -1.12        | -3.94 | 1.69  |
| Mix permanent and new ley                   | 2752 | 61.0  | -0.53        | -3.34 | 2.29  |
| <b>Pasture type</b>                         |      |       |              |       |       |
| <b>(lagged to previous calendar month)</b>  |      |       |              |       |       |
| Permanent grassland                         | 1768 | 31.2  | ref          |       |       |
| New grass ley                               | 3584 | 63.2  | <b>0.81</b>  | 0.67  | 0.95  |
| Mix permanent and new ley                   | 320  | 5.6   | <b>0.58</b>  | 0.46  | 0.69  |
| <b>Sward height</b>                         |      |       |              |       |       |
| <b>(calendar month of visit) (n = 4512)</b> |      |       |              |       |       |
| Approx. 3 cm                                | 1876 | 41.6  | ref          |       |       |
| Approx. 8 cm                                | 2324 | 51.5  | <b>0.14</b>  | 0.07  | 0.20  |
| Approx. > 8 cm                              | 312  | 6.9   | <b>-0.25</b> | -0.39 | -0.11 |
| <b>Sward height</b>                         |      |       |              |       |       |
| <b>(lagged to previous calendar month)</b>  |      |       |              |       |       |
| Approx. 3 cm                                | 2068 | 36.5  | ref          |       |       |
| Approx. 8 cm                                | 3208 | 56.6  | <b>-0.41</b> | -0.49 | -0.33 |
| Approx. > 8 cm                              | 396  | 7.0   | <b>-1.10</b> | -1.22 | -0.97 |
| <b>Rainfall</b>                             |      |       |              |       |       |
| <b>(calendar month of visit)</b>            |      |       |              |       |       |
| Rainfall                                    | 5672 | 100.0 | 0.00         | 0.00  | 0.00  |
| <b>Rainfall</b>                             |      |       |              |       |       |
| <b>(lagged to previous calendar month)</b>  |      |       |              |       |       |
| Temperature                                 | 5672 | 100.0 | <b>0.12</b>  | 0.11  | 0.13  |
| <b>Temperature</b>                          |      |       |              |       |       |
| <b>(lagged to previous calendar month)</b>  |      |       |              |       |       |
| Temperature                                 | 5672 | 100.0 | <b>-0.02</b> | -0.02 | -0.01 |
| <b>Time variable</b>                        |      |       |              |       |       |
| <b>Visit</b>                                |      |       |              |       |       |
| 1 (Sep 2019)                                | 1556 | 27.4  | ref          |       |       |
| 2 (Jan 2020)                                | 1536 | 27.1  | <b>0.46</b>  | 0.38  | 0.53  |
| 3 (Jul 2020)                                | 1356 | 23.9  | <b>0.62</b>  | 0.53  | 0.70  |
| 4 (Sep 2020)                                | 1224 | 21.6  | 0.05         | -0.04 | 0.13  |

β: estimate; CI: confidence interval for estimate; bold estimates are statistically significant at 0.05 as their CIs do not include 0; ref: baseline category for comparison.
